# Supplementary material
Source: PubMed Central journal article supplement (PMC8513110)
Supplement: NIHMS1735474-supplement-318966_Major_Resources_Table.pdf [file NIHMS1735474-supplement-318966_Major_Resources_Table.pdf]

## Major Resources Table

In order to allow validation and replication of experiments, all essential research materials listed in the Methods should be included in the Major Resources Table below. Authors are encouraged to use public repositories for protocols, data, code, and other materials and provide persistent identifiers and/or links to repositories when available. Authors may add or delete rows as needed.

### Animals (in vivo studies)

| Species                         | Vendor or Source   | Background Strain | Sex             | Persistent ID / URL |
|---------------------------------|--------------------|-------------------|-----------------|---------------------|
| Myh6-Cas9                       | Dr. Olson's lab    | C57BL/6 x 129     | Male and female | N/A                 |
| <i>Wis</i> <sup>flox/flox</sup> | Jackson Laboratory | 129S6/SvEvTac     | Male and female | 012888              |
| <i>Myh6-Cre-Ert2</i>            | Jackson Laboratory | FVB/N             | Male and female | 005657              |
| TCF/LEF:H2B-GFP                 | Jackson Laboratory | C57BL/6 x 129     | Male and female | 013752              |

### Genetically Modified Animals

|                 | Species                                        | Vendor or Source   | Background Strain     | Other Information | Persistent ID / URL |
|-----------------|------------------------------------------------|--------------------|-----------------------|-------------------|---------------------|
| Parent - Male   | <i>Myh6-Cre-Ert2; Wis</i> <sup>flox/flox</sup> | Jackson Laboratory | FVB/N x 129S6/SvEvTac |                   |                     |
| Parent - Female | <i>Wis</i> <sup>flox/flox</sup>                | Jackson Laboratory | 129S6/SvEvTac         |                   | 012888              |

### Antibodies

| Target antigen               | Vendor or Source          | Catalog # | Working concentration         | Lot # (preferred but not required) | Persistent ID / URL                                                                                                                                                                                                                                                                                           |
|------------------------------|---------------------------|-----------|-------------------------------|------------------------------------|---------------------------------------------------------------------------------------------------------------------------------------------------------------------------------------------------------------------------------------------------------------------------------------------------------------|
| rabbit anti-Wis              | Abcam                     | ab82897   | 1:200 For IF<br>1:1000 For WB |                                    | <a href="https://www.abcam.com/gpr177wls-antibody-ab82897.html">https://www.abcam.com/gpr177wls-antibody-ab82897.html</a>                                                                                                                                                                                     |
| rabbit anti-ROR1             | Cell Signaling Technology | #4102     | 1:1000 For WB                 |                                    | <a href="https://www.cellsignal.com/products/primary-antibodies/antibody/4102">https://www.cellsignal.com/products/primary-antibodies/antibody/4102</a>                                                                                                                                                       |
| rabbit anti-LRP6             | Cell Signaling Technology | #3395     | 1:1000 For WB                 |                                    | <a href="https://www.cellsignal.com/products/primary-antibodies/rabbit-mab/3395?site-search-type=Products&amp;N=4294956287&amp;Ntt=lrp6&amp;fromPage=plp">https://www.cellsignal.com/products/primary-antibodies/rabbit-mab/3395?site-search-type=Products&amp;N=4294956287&amp;Ntt=lrp6&amp;fromPage=plp</a> |
| rabbit anti $\beta$ -catenin | Cell Signaling Technology | #9562     | 1:200 For IF<br>1:1000 For WB |                                    | <a href="https://www.cellsignal.com/products/primary-antibodies/antibody/9562?site-search-type=Products&amp;N=4294956287&amp;Ntt=%239562&amp;fromPage=">https://www.cellsignal.com/products/primary-antibodies/antibody/9562?site-search-type=Products&amp;N=4294956287&amp;Ntt=%239562&amp;fromPage=</a>     |
| rabbit anti-Axin2            | Abcam                     | ab32197   | 1:1000 For WB                 |                                    | <a href="https://www.abcam.com/axin-2-antibody-ab32197.html">https://www.abcam.com/axin-2-antibody-ab32197.html</a>                                                                                                                                                                                           |
| rabbit anti-GAPDH            | Abcam                     | ab9485    | 1:3000 For WB                 |                                    | <a href="https://www.abcam.com/gapdh-antibody-loading-control-">https://www.abcam.com/gapdh-antibody-loading-control-</a>                                                                                                                                                                                     |
| Rabbit IgG-HRP               | Bio-rad                   | 1706515   | 1:5000 for WB                 |                                    | <a href="https://www.bio-rad.com/en-us/sku/1706515-goat-anti-ra-conjugate?ID=1706515">https://www.bio-rad.com/en-us/sku/1706515-goat-anti-ra-conjugate?ID=1706515</a>                                                                                                                                         |
| Mouse IgG-HRP                | Santa cruz                | sc-2055   | 1:5000 for WB                 |                                    | <a href="https://datasheets.scbt.com/sc-2055.pdf">https://datasheets.scbt.com/sc-2055.pdf</a>                                                                                                                                                                                                                 |

DOI [to be added]

|                                                    |                          |         |              |  |                                                                                                                                                                                                   |
|----------------------------------------------------|--------------------------|---------|--------------|--|---------------------------------------------------------------------------------------------------------------------------------------------------------------------------------------------------|
| mouse anti-troponin T                              | Thermo Fisher            | #MS-295 | 1:200 For IF |  | <a href="http://tools.thermofisher.com/content/sfs/brochures/D11">http://tools.thermofisher.com/content/sfs/brochures/D11</a>                                                                     |
| rat anti-pHH3                                      | Abcam                    | ab10543 | 1:200 For IF |  | <a href="https://www.abcam.com/histone-h3-phospho-s28-antiboc-ab10543.html">https://www.abcam.com/histone-h3-phospho-s28-antiboc-ab10543.html</a>                                                 |
| rabbit anti-vimentin                               | Abcam                    | ab92547 | 1:200 For IF |  | <a href="https://www.abcam.com/vimentin-antibody-epr3776-cyto-marker-ab92547.html">https://www.abcam.com/vimentin-antibody-epr3776-cyto-marker-ab92547.html</a>                                   |
| rabbit anti-collagen I                             | Abcam                    | ab21286 | 1:200 For IF |  | <a href="https://www.abcam.com/collagen-i-antibody-ab21286.htm">https://www.abcam.com/collagen-i-antibody-ab21286.htm</a>                                                                         |
| chicken anti-GFP                                   | Abcam                    | ab13970 | 1:200 For IF |  | <a href="https://www.abcam.com/gfp-antibody-ab13970.html">https://www.abcam.com/gfp-antibody-ab13970.html</a>                                                                                     |
| Horse Anti-Rabbit IgG Antibody (H+L), Biotinylated | Vector Lab               | BA-1100 | 1:200 For IF |  | <a href="https://vectorlabs.com/biotinylated-horse-anti-rabbit-igg-">https://vectorlabs.com/biotinylated-horse-anti-rabbit-igg-</a>                                                               |
| Goat Anti-Chicken IgY Antibody (H+L), Biotinylated | Vector Lab               | BA-9010 | 1:200 For IF |  | <a href="https://vectorlabs.com/biotinylated-goat-anti-chicken-igy-">https://vectorlabs.com/biotinylated-goat-anti-chicken-igy-</a>                                                               |
| Goat Anti-Rat IgG Antibody (H+L), Biotinylated     | Vector Lab               | BA-9400 | 1:200 For IF |  | <a href="https://vectorlabs.com/biotinylated-goat-anti-rat-igg-antib">https://vectorlabs.com/biotinylated-goat-anti-rat-igg-antib</a>                                                             |
| Horse Anti-Mouse IgG Antibody (H+L), Biotinylated  | Vector Lab               | BA-2000 | 1:200 For IF |  | <a href="https://vectorlabs.com/biotinylated-horse-anti-mouse-igg-">https://vectorlabs.com/biotinylated-horse-anti-mouse-igg-</a>                                                                 |
| Streptavidin, Alexa Fluor™ 488 conjugate           | Thermo Fisher Scientific | S32354  | 1:200 For IF |  | <a href="https://www.thermofisher.com/order/catalog/product/S3">https://www.thermofisher.com/order/catalog/product/S3</a>                                                                         |
| Streptavidin, Alexa Fluor™ 546 conjugate           | Thermo Fisher Scientific | S11225  | 1:200 For IF |  | <a href="https://www.thermofisher.com/order/catalog/product/S1hj-S11225#/S11225?SID=srch-hj-S11225">https://www.thermofisher.com/order/catalog/product/S1hj-S11225#/S11225?SID=srch-hj-S11225</a> |
| Wheat Germ Agglutinin, Alexa Fluor™ 594 conjugate  | Thermo Fisher Scientific | W11262  | 1:200 For IF |  | <a href="https://www.thermofisher.com/order/catalog/product/W1hj-W11262#/W11262?SID=srch-hj-W11262">https://www.thermofisher.com/order/catalog/product/W1hj-W11262#/W11262?SID=srch-hj-W11262</a> |

#### DNA/cDNA Clones

| Clone Name                      | Sequence          | Source / Repository | Persistent ID / URL |
|---------------------------------|-------------------|---------------------|---------------------|
| PX-458                          | Cas9              | Addgene             | #48183              |
| 1179_pAAV-U6-BbsI-gRNA-CB-EmGFP | For gRNA delivery | Addgene             | #89060              |
|                                 |                   |                     |                     |

**Cultured Cells**

| Name      | Vendor or Source         | Sex (F, M, or unknown) | Persistent ID / URL                                                                                                                                                                                                                                       |
|-----------|--------------------------|------------------------|-----------------------------------------------------------------------------------------------------------------------------------------------------------------------------------------------------------------------------------------------------------|
| Human CFs | Lifeline Cell Technology | M                      | <a href="https://www.lifelinecelltech.com/shop/cells/fibroblasts/cardiac-fibroblasts/normal-human-cardiac-fibroblasts-fc-0060/">https://www.lifelinecelltech.com/shop/cells/fibroblasts/cardiac-fibroblasts/normal-human-cardiac-fibroblasts-fc-0060/</a> |
|           |                          |                        |                                                                                                                                                                                                                                                           |
|           |                          |                        |                                                                                                                                                                                                                                                           |

**Data & Code Availability**

| Description                      | Source / Repository                                            | Persistent ID / URL |
|----------------------------------|----------------------------------------------------------------|---------------------|
| Bulk RNA-seq for CMs and non-CMs | <a href="mailto:geo@ncbi.nlm.nih.gov">geo@ncbi.nlm.nih.gov</a> | GSE179355           |
|                                  |                                                                |                     |
|                                  |                                                                |                     |

**Other**

| Description | Source / Repository | Persistent ID / URL |
|-------------|---------------------|---------------------|
|             |                     |                     |
|             |                     |                     |
|             |                     |                     |
