# Supplementary material
Source: PubMed Central journal article supplement (PMC8513110)
Supplement: NIHMS1735474-supplement-318966_Uncut_Gel_Blots.pdf [file NIHMS1735474-supplement-318966_Uncut_Gel_Blots.pdf]

Full unedited gel for Figure 3B

Fig 3B

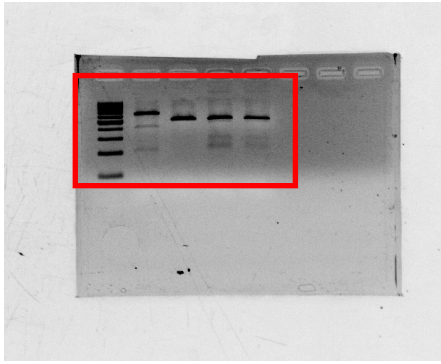

Fig 3B negative

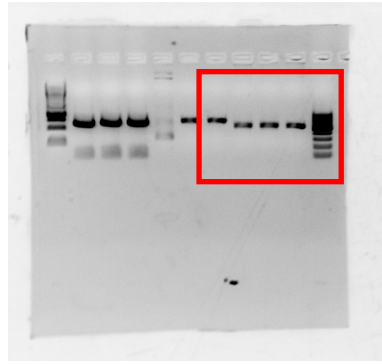

Full unedited gel for Figure 3C

Fig 3C Wls

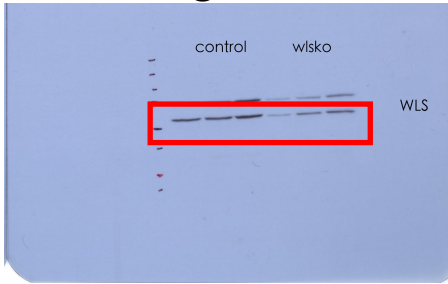

Fig 3C GAPDH

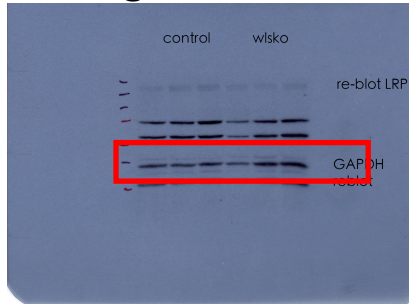

Full unedited gel for Figure 4A

Fig 4A LRP6

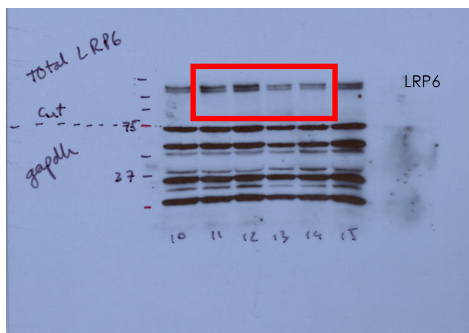

Fig 4A B-Catenin

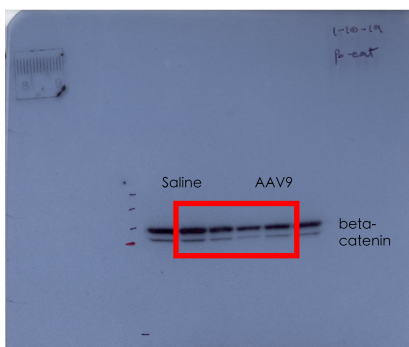

Fig 4A Axin2

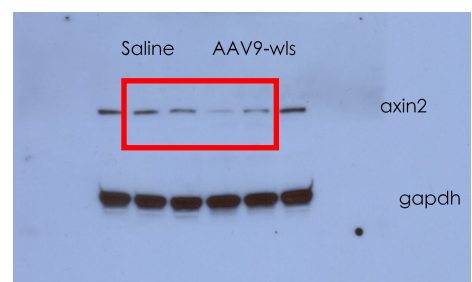

Fig 4A Wls

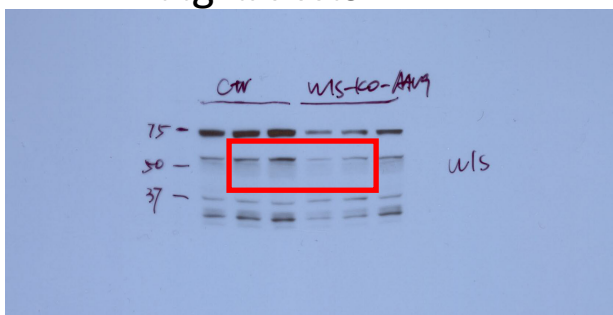

Full unedited gel for Figure 4A

Fig 4A GAPDH

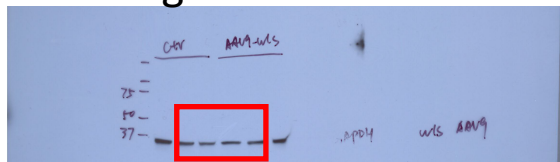

Fig 4A ROR1

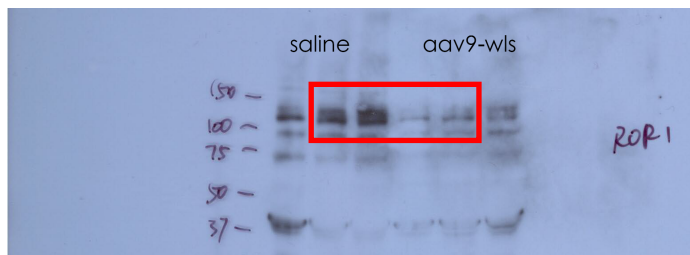

Full unedited gel for Figure 4C

Fig 4C LRP6

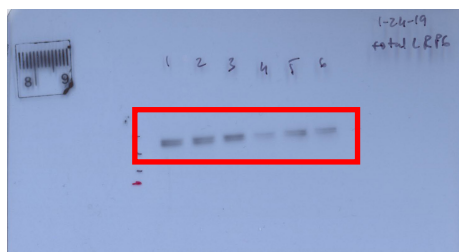

Fig 4C ROR1

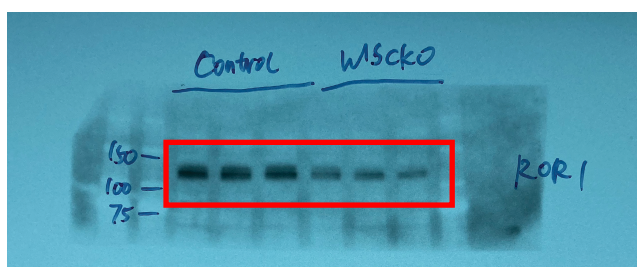

Fig 4C GAPDH

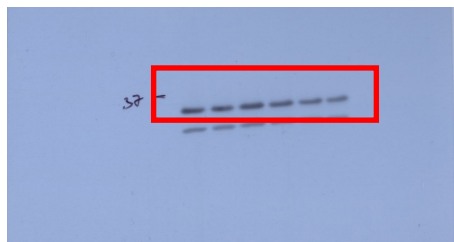

Full unedited gel for Figure 4E

Fig 4E

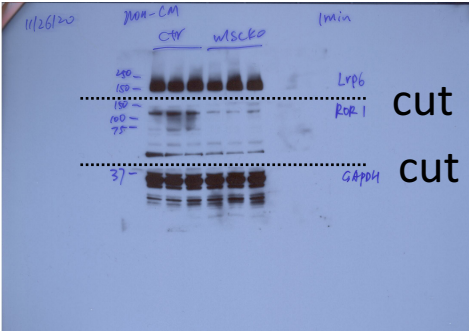

Fig 4E ROR1

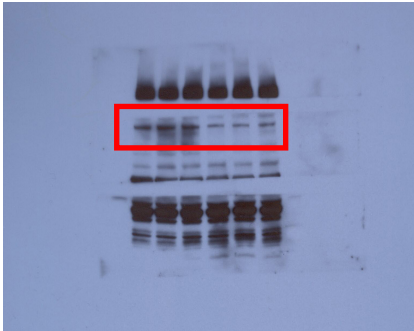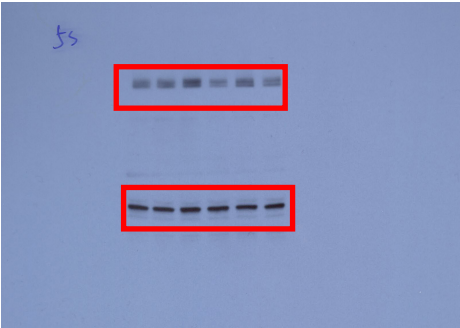

Fig 4E LRP6

Fig 4E GAPDH
